# Supplementary material
Source: PubMed Central journal article supplement (PMC4237493)

Submitted Thursday, July 31, 2014  
Revised version submitted Tuesday, September 09, 2014

# The pathway of human AS3MT arsenic methylation

## Supplemental Information

Dharmendra S. Dheeman, Charles Packianathan, Jitesh K. Pillai and Barry P. Rosen<sup>1</sup>

Department of Cellular Biology and Pharmacology, Herbert Wertheim College of Medicine, Florida International University, Miami, FL 33199 USA

Running title: AS3MT mechanism

To whom correspondence should be addressed: Barry P. Rosen, Department of Cellular Biology and Pharmacology, Herbert Wertheim College of Medicine, Florida International University, Miami, FL 33199 USA, [brosen@fiu.edu](mailto:brosen@fiu.edu)

**Table S1: Oligonucleotide primers for mutagenesis of cysteine residues**

| <b>Primer</b>                                                       | <b>Sequence</b>                               |
|---------------------------------------------------------------------|-----------------------------------------------|
| Oligonucleotides for mutagenesis of conserved cysteine residues     |                                               |
| C32S forward                                                        | 5'-GCTGATCTGCAAACGAACGGTAGCGTGACCACG-3'       |
| reverse                                                             | 5'-CGTGGTCACGCTACCGTTCGTTGCAGATCAGC-3'        |
| C61S forward                                                        | 5'-CTGCGTTATTACGGCAGCGGTCTGGTGATCC-3'         |
| reverse                                                             | 5'-GGATCACCAGACCGCTGCCGTAATAACGCAG-3'         |
| C156S forward                                                       | 5'-ATGATATCGTGGTTTCTAACAGCGTCATTAATCTGGTGC-3' |
| reverse                                                             | 5'-GCACCAGATTAATGACGCTGTAGAAACCACGATATCAT-3'  |
| C206S forward                                                       | 5'-GTTCTGTGGGGTGAAAGCCTGGGCGGTG-3'            |
| reverse                                                             | 5'-CACCGCCAGGCTTTCACCCACAGAAC-3'              |
| Oligonucleotides for mutagenesis of non-conserved cysteine residues |                                               |
| C72S forward                                                        | 5'-CCCGGAACATCTGGAAAACAGTTGGATTCTGGATC-3'     |
| reverse                                                             | 5'-GATCCAGAATCCAAC TGT TTTCCAGATGTTCCGGG-3'   |
| C85S forward                                                        | 5'-GGTTCTGGCCGCGACAGTTATGTTCTGAGCC-3'         |
| reverse                                                             | 5'-GGCTCAGAACATAACTGTCGCGGCCAGAACC-3'         |
| C250S forward                                                       | 5'-TGGAACGTGTTATTGGCGATAGCCGCTTCGTC-3'        |
| reverse                                                             | 5'-GACGAAGCGGCTATCGCCAATAACACGTTCCA-3'        |

**Table S2: Oligonucleotide primers for mutagenesis of tryptophan residues**

| <b>Primer</b>       | <b>Sequence</b>                              |
|---------------------|----------------------------------------------|
| W73R forward        | 5' -TCCCGGAACATCTGGAAAACGTAGGATTCTGGATC-3'   |
| reverse             | 5' -GATCCAGAATCCTACAGTTTTCCAGATGTTCCGGGA-3'  |
| W73L forward        | 5' -AACATCTGGAAAACGTTTGATTCTGGATCTGGGCAG-3'  |
| reverse             | 5' -CTGCCCAGATCCAGAATCAAACAGTTTTCCAGATGTT-3' |
| W203L forward       | 5' -TCGCACGCACAAAGTTCTGTTGGGTGAATGCC-3'      |
| reverse             | 5' -GGCATTACCCAACAGAACTTTGTGCGTGCGA-3'       |
| W213L forward       | 5' -GCGGTGCACTGTACTTGAAGGAACTGGCAGT-3'       |
| reverse             | 5' -ACTGCCAGTTCCTTCAAGTACAGTGCACCGC-3'       |
| W73R/W203Y forward  | 5' -TCGCACGCACAAAGTTCTGTATGGTGAATGCCTGGG-3'  |
| reverse             | 5' -CCCAGGCATTACCATACAGAACTTTGTGCGTGCGA-3'   |
| W73R/W213Y forward  | 5' -GGCGGTGCACTGTACTATAAGGAACTGGCAGTGC-3'    |
| reverse             | 5' -GCACTGCCAGTTCCTTATAGTACAGTGCACCGCC-3'    |
| W203L/W213Y forward | 5' -GGCGGTGCACTGTACTATAAGGAACTGGCAGTGC-3'    |
| reverse             | 5' -GCACTGCCAGTTCCTTATAGTACAGTGCACCGCC-3'    |

**Fig. S1. Nucleotide sequence of the hAS3MT cDNA clone and the synthetic gene. Conserved nucleotides are indicated (\*).**

|                  |                                                                         |     |
|------------------|-------------------------------------------------------------------------|-----|
| <b>cDNA</b>      | ATGGCTGCACTTCGTGACGCTGAGATACAGAAGGACGTGCAGACCTACTACGGGCAGGTG            | 60  |
| <b>Synthetic</b> | ATGGCTGCTCTGCGTGATGCCGAAATCCAAAAAGATGTCCAAACCTACTACGGTCAAGTG            | 60  |
|                  | ***** * * ***** ** ** ** * * * * * * * * * * * * * * * * * * * * *      |     |
| <b>cDNA</b>      | CTGAAGAGATCGGCAGACCTCCAGACCAACGGCTGTGTCCACCACAGCCAGGCCGGTCCCC           | 120 |
| <b>Synthetic</b> | CTGAAACGCTCCGCTGATCTGCAAACGAACGGTTGCGTGACCACGGCAGCTCCGGTCCG             | 120 |
|                  | ***** * * * * * * * * * * * * * * * * * * * * * * * * * * * * * * * * * |     |
| <b>cDNA</b>      | AAGCACATCCGGGAAGCCTTGCAAAATGTACACGAAGAAGTAGCCCTAAGATATTATGGC            | 180 |
| <b>Synthetic</b> | AAACATATCCGCGAAGCGCTGCAGAAATGTGCACGAAGAAGTTGCCCTGCGTTATTACGGC           | 180 |
|                  | * * * * * * * * * * * * * * * * * * * * * * * * * * * * * * * * * *     |     |
| <b>cDNA</b>      | TGTGGTCTGGTGATCCCTGAGCATCTAGAAAAGTCTGGATTTTGGATCTGGGTAGTGGA             | 240 |
| <b>Synthetic</b> | TGCGGTCTGGTGATCCCGAAACATCTGGAAAAGTCTGGATTTTGGATCTGGGCAGCGGT             | 240 |
|                  | * * * * * * * * * * * * * * * * * * * * * * * * * * * * * * * * * *     |     |
| <b>cDNA</b>      | AGTGGCAGAGATTGCTATGTACTTAGCCAGCTGGTTGGTAAAAAGGACACGTGACTGGA             | 300 |
| <b>Synthetic</b> | TCTGGCCGCGACTGTTATGTTCTGAGCCAGCTGGTCGGTAAAAAGGCCACGTGACCGGT             | 300 |
|                  | **** * * * * * * * * * * * * * * * * * * * * * * * * * * * * * * * * *  |     |
| <b>cDNA</b>      | ATAGACATGACCAAAGGCCAGGTGGAAGTGGCTGAAAAGTATCTTGACTATCACATGGAA            | 360 |
| <b>Synthetic</b> | ATTGATATGACGAAAGGCCAAGTCGAAGTGGCAGAAAAGTATCTGGACTACCATATGGAA            | 360 |
|                  | * * * * * * * * * * * * * * * * * * * * * * * * * * * * * * * * * *     |     |
| <b>cDNA</b>      | AAATATGGCTTCCAGGCATCTAATGTGACTTTTATTCATGGCTACATTGAGAAGTTGGGA            | 420 |
| <b>Synthetic</b> | AAATATGGTTTTTCAGGCTTCTAACGTTACCTTCATTCACGGCTACATCGAAAAGTGGGT            | 420 |
|                  | ***** * * * * * * * * * * * * * * * * * * * * * * * * * * * * * * * * * |     |
| <b>cDNA</b>      | GAGGCTGGAATCAAGAATGAGAGCCATGATATTGTTGTATCAAACCTGTGTTATTAACCTT           | 480 |
| <b>Synthetic</b> | GAAGCGGCATTAAGAATGAAAGCCATGATATCGTGGTTTCTAACTGCGTCATTAATCTG             | 480 |
|                  | * * * * * * * * * * * * * * * * * * * * * * * * * * * * * * * * * *     |     |
| <b>cDNA</b>      | GTGCCCTGATAACAACAAGTCTTCAGGAGGCATATCGGGTGTGAAAGCATGGTGGGGAG             | 540 |
| <b>Synthetic</b> | GTGCCGGACAAGCAGCAAGTCTTCGCAAGAAGCCTATCGTGTGCTGAAACATGGCGGTGAA           | 540 |
|                  | ***** * * * * * * * * * * * * * * * * * * * * * * * * * * * * * * * * * |     |
| <b>cDNA</b>      | TTATATTTTCAGTGACGTCTATACGAGCCTTGAAGTCCGAGAAATCAGGACACACAAA              | 600 |
| <b>Synthetic</b> | CTGTATTTTTCAGATGTCTACACCTCGCTGGAAGTCCGGAAGAAATTCGCACGCACAAA             | 600 |
|                  | * ***** ** ***** ** * * * * * * * * * * * * * * * * * * * * *           |     |
| <b>cDNA</b>      | GTTTTATGGGGTGAGTGTCTGGGTGGTGCTTTATACTGGAAGGAAGTGGCTGTCTTGGCT            | 660 |
| <b>Synthetic</b> | GTTCTGTGGGGTGAATGCCTGGGCGGTGCACTGTACTGGAAGGAAGTGGCAGTGTCTGGCT           | 660 |
|                  | *** * * * * * * * * * * * * * * * * * * * * * * * * * * * * * * * * *   |     |
| <b>cDNA</b>      | CAAAAAATTGGGTCTGCCCTCCACGTTTGGTCACTGCCAATCTCATTACAATTCAAAC              | 720 |
| <b>Synthetic</b> | CAGAAAATCGGCTTTTGTCCGCCGCTGCTGGTTACCGCAAACCTGATTACGATCCAAAAT            | 720 |
|                  | * * * * * * * * * * * * * * * * * * * * * * * * * * * * * * * * * *     |     |
| <b>cDNA</b>      | AAGGAAGTGGAAAGAGTTATCGGTGACTGTGTTTTGTTTCTGCAACATTTTCGCTCTTC             | 780 |
| <b>Synthetic</b> | AAGGAAGTGGAAAGTGTATTGCGGATTGCCGCTTCGTCAGTGCTACCTTTTCGCTGTTC             | 780 |
|                  | ***** * * * * * * * * * * * * * * * * * * * * * * * * * * * * * * * * * |     |
| <b>cDNA</b>      | AAACACTCTAAGACAGGACCAACCAAGAGATGCCAAGTATTTACAATGGAGGAATTACA             | 840 |
| <b>Synthetic</b> | AAACATTTCAAGACCGGTCCGACGAAACGCTGTCAAGTATTTATAACGGCGGTATCACC             | 840 |
|                  | ***** * * * * * * * * * * * * * * * * * * * * * * * * * * * * * * * * * |     |

**cDNA** GGACATGAAAAAGAACTAATGTTTGATGCCAATTTTACATTTAAGGAAGGTGAAATTGTT 900  
**Synthetic** GGCCACGAAAAGGAACTGATGTTTCGATGCGAATTTTACGTTCAAAGAAGGTGAAATCGTG 900  
 \*\* \*\* \*\*\*\*\* \*\*\*\*\* \*\*\*\*\* \*\*\*\*\* \*\*\*\*\* \*\* \*\* \*\*\*\*\* \*\*

**cDNA** GAAGTGGATGAAGAAACAGCAGCTATCTTGAAGAATTCAGATTTGCTCAAGATTTTCTG 960  
**Synthetic** GAAGTGGATGAAGAAACCGCGGCCATTCTGAAAAATAGCCGTTTTGCGCAGGATTTCTG 960  
 \*\*\*\*\* \*\*\*\*\* \*\* \*\* \* \*\* \* \*\* \* \*\* \* \*\* \* \*\* \* \*\*

**cDNA** ATCAGACCAATTGGAGAGAAGTTGCCAACATCTGGAGGCTGTTCTGCTTTGGAGTTAAAG 1020  
**Synthetic** ATTCGCCCCGATCGGCGAAAAGCTGCCGACGAGTGGCGGTTGTTCCGCCCTGGAAGTAAA 1020  
 \*\* \* \*\* \* \*\* \* \*\* \* \*\* \* \*\* \* \*\* \* \*\* \* \*\* \* \*\* \* \*\* \* \*\*

**cDNA** GATATAATCACAGATCCATTTAAGCTTGCAGAAGAGTCTGACAGTATGAAGTCCAGATGT 1080  
**Synthetic** GATATTATCACCGACCCGTTCAAACCTGGCGGAAGAATCAGACTCAATGAAATCACGCTGT 1080  
 \*\*\*\*\* \*\*\*\*\* \*\* \*\* \* \*\* \* \*\* \* \*\* \* \*\* \* \*\* \* \*\* \* \*\* \* \*\*

**cDNA** GTCCCTGATGCTGCTGGA 1098  
**Synthetic** GTGCCGGATGCTGCGGGT 1098  
 \*\* \*\* \*\*\*\*\* \*\*

**Fig. S2. Amino acid sequence of synthetic hAS3MT.** Nucleotide and amino acid sequence of synthetic hAS3MT. Amino acid residues 1-218 are GST; residues 37-42 are a thrombin site; residues 73-38 are an enterokinase site; residues 280-645 are hAS3MT (underlined), and residues 655-662 are the eight histidine tag.

```

atgtcccctatactagggttattggaaaattaagggccttgtgcaaccactcgacttcttttggaaatatcttgaa
  M S P I L G Y W K I K G L V Q P T R L L L E Y L E 25
gaaaaatatgaagagcattttgtatgagcgcgatgaaggtgataaatggcgaaacaaaaagtttgaattgggtttg
  E K Y E E H L Y E R D E G D K W R N K K F E L G L 50
gagtttcccaatcttcttattatattgatgggtgatgttaaattaacacagctctatggccatcatatcgttatata
  E F P N L P Y Y I D G D V K L T Q S M A I I R Y I 75
gctgacaagcacaacatggttgggtggttgtccaaaagagcgtgcagagatttcaatgcttgaaggagcgggttttg
  A D K H N M L G G C P K E R A E I S M L E G A V L 100
gatattagatcgggtgttccgagattgcatatagtaaagactttgaaactctcaaagttgattttcttagcaAG
  D I R Y G V S R I A Y S K D F E T L K V D F L S K 125
ctacctgaaatgctgaaaatgttcgaagatcgtttatgtcataaaacatatttaaatggtgatcatgtaaccat
  L P E M L K M F E D R L C H K T Y L N G D H V T H 150
cctgacttcatggttgatgacgctcttgatggttgtttatacatggacccaatgtgcctggatgcggttcccaaaa
  P D F M L Y D A L D V V L Y M D P M C L D A F P K 175
ttagtttgttttaaaaaacgtattgaagctatcccacaaattgataagtacttgaaatccagcaagtatatagca
  L V C C F K K R I E A I P Q I D K Y L K S S K Y I A 200
tggccttgagggtggcaagccacgtttgggtggggaccactctccaaaatcggatggttcaactagtggtT
  W P L Q G W Q A T F G G G G D H P P K S D G S T S G 225
tctggtcatcaccatcaccatcactccgcggttctggtgcccacgcggtagtactgcaattggtatgaaagaaacc
  S G H H H H H S A G L V P R G S T A I G M K E T 250
gctgctgctaaattcgaacgccagcacatggacagcccagatctgggtaccggtggtggctccggtgatgacgac
  A A A K F E R Q H M D S P D L G T G G G S G D D D 275
gacaagagtcccatggctgctctgctgatgccgaaatccaaaagatgtccaaacctactacggtcaagtgctg
  D K S P M A A L R D A E I Q K D V Q T Y Y G Q V L 300
aaacgctccgctgatctgcaaacgaacggttgcgtgaccacggcacgtccggttccgaaacatatccgcaagcg
  K R S A D L Q T N G C V T T A R P V P K H I R E A 325
ctgcagaatgtgcacgaagaagttgcctgcttattacggctgcggtctggtgatcccggaacatctggaaaac
  L Q N V H E E V A L R Y Y G C G L V I P E H L E N 350
tgttgattctggatctgggcagcgggttctggccgcgactggtatgttctgagccagctggtcgggtgaaaaaggc
  C W I L D L G S G S G R D C Y V L S Q L V G E K G 375
cacgtgaccggtattgatatgacgaaaggccaagtgcgaagtgccagaaaagtatctggactaccatattgaaaaa
  H V T G I D M T K G Q V E V A E K Y L D Y H M E K 400
tatggttttcaggcttctaacgttaccttcattcacggctacatcgaaaaactgggtgaaagcgggcattaagaat
  Y G F Q A S N V T F I H G Y I E K L G E A G I K N 425
gaaagccatgatatcgtggtttctaaactgcvtcattaatctggtgccggacaagcagcaagtctctgcaagaacc
  E S H D I V V S N C V I N L V P D K Q Q V L Q E A 450
tatcgtgctgaaacatggcgggtgaactgtatttttcagatgctacacctcgctggaactgccggaagaatt
  Y R V L K H G G E L Y F S D V Y T S L E L P E E I 475
cgcacgcacaaaagttctgtgggtgaaatgcctggggcgggtgcactgtactggaaggaactggcagtgctggctcag
  R T H K V L W G E C L G G A L Y W K E L A V L A Q 500
aaaatcggcttttgtccgccgctctggttaccgcaaacctgattacgatccaaaataaggaactggaacgtggt
  K I G F C P P R L V T A N L I T I Q N K E L E R V 525
attggcgattgccgcttctgctcagtgctaccttttctgtctgttcaaacattccaagaccggtccgacgaaaacgctgt
  I G D C R F V S A T F R L F K H S K T G P T K R C 550
caagtgattataacggcgggtatcaccggccacgaaaaggaactgatggttcgatgcgaattttacgttcaaagaa
  Q V I Y N G G I T G H E K E L M F D A N F T F K E 575
ggtgaaatcgtggaagtggatgaagaaaccgcgccattctgaaaaatagccggttttgcgcaggatttctgatt
  G E I V E V D E E T A A I L K N S R F A Q D F L I 600
cgccccgatcggcgaaaagctgccgacgagtgccggttgttccgccctggaactgaaagatattatcaccgaccgg
  R P I G E K L P T S G G C S A L E L K D I I T D P 625
ttcaaacctggcgaagaatcagactcaatgaaatcacgctgtgtgccggatgctgcgggtgtcgacaagcttgcg
  F K L A E E S D S M K S R C V P D A A G V D K L A 650
gccgcactcgagcaccaccaccaccaccaccactaa
  A A L E H H H H H H H H *

```

**Fig. S3. Multiple alignment of hAS3MT with orthologues.** *Homo sapiens* As(III) S-adenosylmethionine methyltransferase (AA119639) was aligned with eukaryotic orthologues from *Rattus norvegicus* (rAS3MT, NP\_543166), *Danio rerio* (zAS3MT, NP\_001034928), *Chlamydomonas reinhardtii* (CrArsM, XP\_001703619) and *Cyanidioschyzon merolae* (CmArsM, FJ476310). The shading illustrates conserved residues, with conserved cysteine residues highlighted in gray. The asterisks denotes position of tryptophan residues. Boxed residues denote residues not included in the cDNA clone or synthetic hAS3MT.

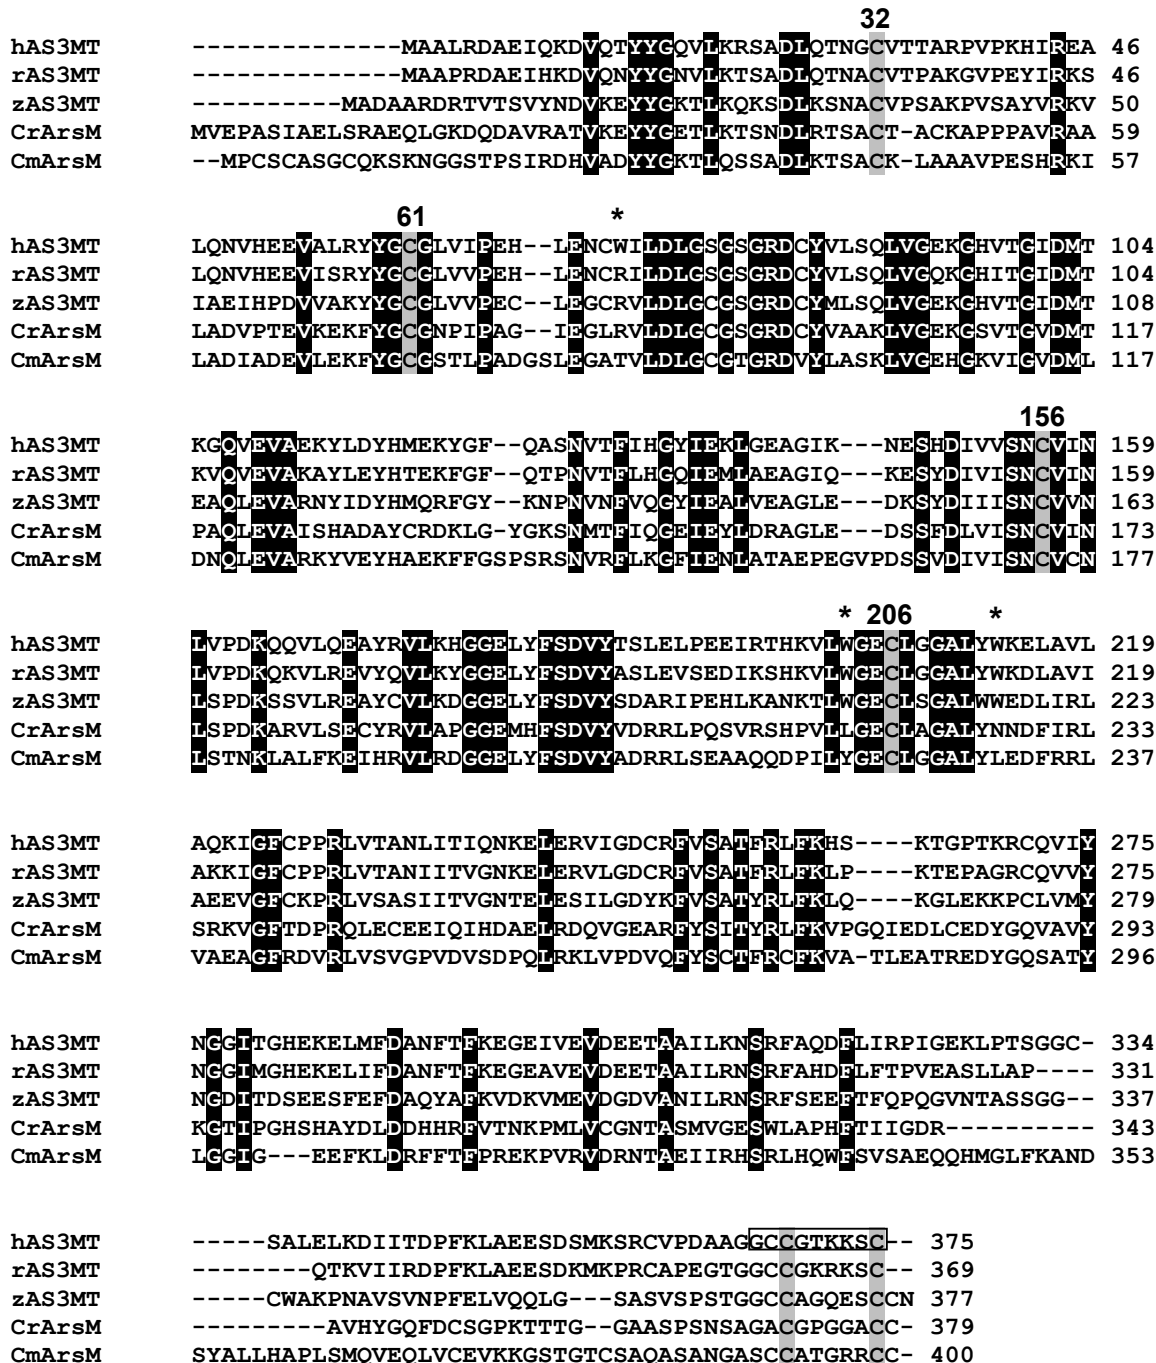

Supplement: tx500313k_si_001.pdf [file tx500313k_si_001.pdf]
